# Supplementary material
Source: PubMed Central journal article supplement (PMC2774813)
Supplement: NIHMS117140-supplement-st1.pdf [file NIHMS117140-supplement-st1.pdf]

**Table S1.**

| <b>Vesicular Marker</b> | <b>Cos2 colocalization (%)</b> | <b>SD</b> | <b>Random colocalization (%)</b> | <b>SD</b> |
|-------------------------|--------------------------------|-----------|----------------------------------|-----------|
| Rab5                    | 30.6                           | 11.3      | 3.9                              | 1.7       |
| Rab11                   | 12.3                           | 5.9       | 0.9                              | 0.8       |
| LBPA                    | 8.3                            | 1.8       | 0.6                              | 0.3       |
| Lysotracker             | 11.2                           | 4.3       | 4.5                              | 1.5       |
| HRS                     | 10.4                           | 3.1       | 3.8                              | 1.5       |
