# Supplementary material
Source: PubMed Central journal article supplement (PMC2774813)
Supplement: NIHMS117140-supplement-st2.pdf [file NIHMS117140-supplement-st2.pdf]

**Table S2.**

| <b>GFP-tagged Constructs</b>  | <b>Particle Size</b> | <b>Velocity (nm/sec)</b> | <b>SE</b> |
|-------------------------------|----------------------|--------------------------|-----------|
| Cos2                          | Small                | 61.7                     | 6.8       |
|                               | Medium               | 37.4                     | 13.6      |
|                               | Large                | 20.7                     | 9.1       |
| Cos2- $\Delta$ Motor          | Small                | 12.2**                   | 6.6       |
|                               | Medium               | 10.5                     | 10.6      |
|                               | Large                | 12.5                     | 12.3      |
| Cos2-S182N                    | Small                | 2.9**                    | 1.4       |
|                               | Medium               | 1.0**                    | 0.7       |
|                               | Large                | ND                       | ND        |
| ATP-depleted Cos2             | Small                | 12.8**                   | 6.1       |
|                               | Medium               | 0**                      | 0         |
|                               | Large                | ND                       | ND        |
| ATP-depletion control         | Small                | 73.6                     | 23.5      |
|                               | Medium               | 13.1                     | 13.1      |
|                               | Large                | 10.4                     | 10.5      |
| Cos2 colocalized with Fu-tail | Small                | 87.5                     | 14.1      |
|                               | Medium               | 35.7                     | 34.0      |
|                               | Large                | 6.3                      | 6.3       |
| Cos2 colocalized with Ci-CORD | Small                | 77.7                     | 9.5       |
|                               | Medium               | 71.9                     | 16.9      |
|                               | Large                | 3.0                      | 2.5       |
| Cos2 colocalized with Smo     | Small                | 167.3**                  | 33.8      |
|                               | Medium               | 119.7                    | 47.6      |
|                               | Large                | 13.7                     | 13.7      |
| Klp10A                        | Small                | 253.5**                  | 75.1      |
|                               | Medium               | 204.3**                  | 52.0      |
|                               | Large                | 350.6                    | 145.5     |
