# Supplementary material
Source: PubMed Central journal article supplement (PMC2774813)

Figure S1.

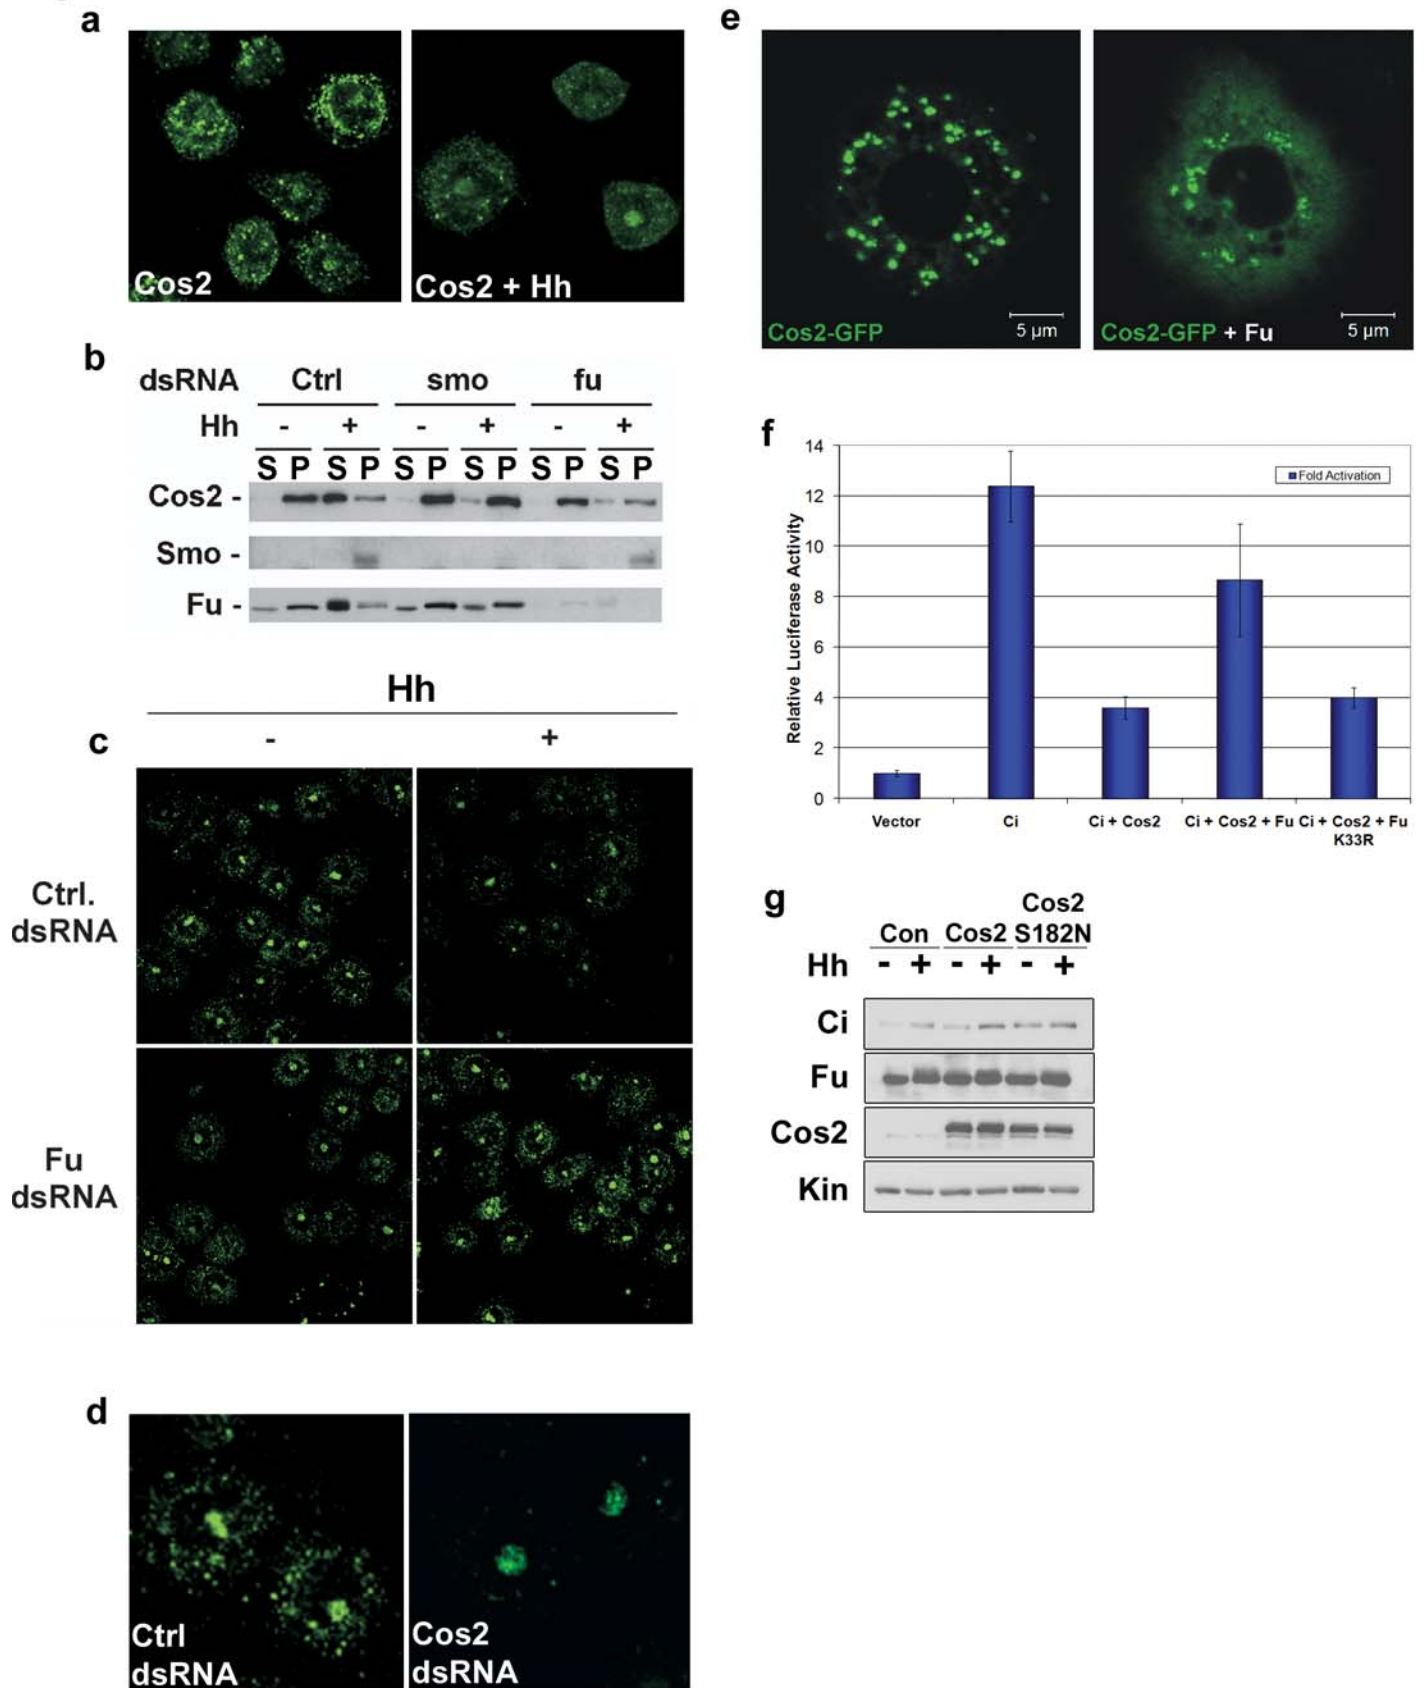

Supplement: NIHMS117140-supplement-s1.pdf [file NIHMS117140-supplement-s1.pdf]

Figure S2.

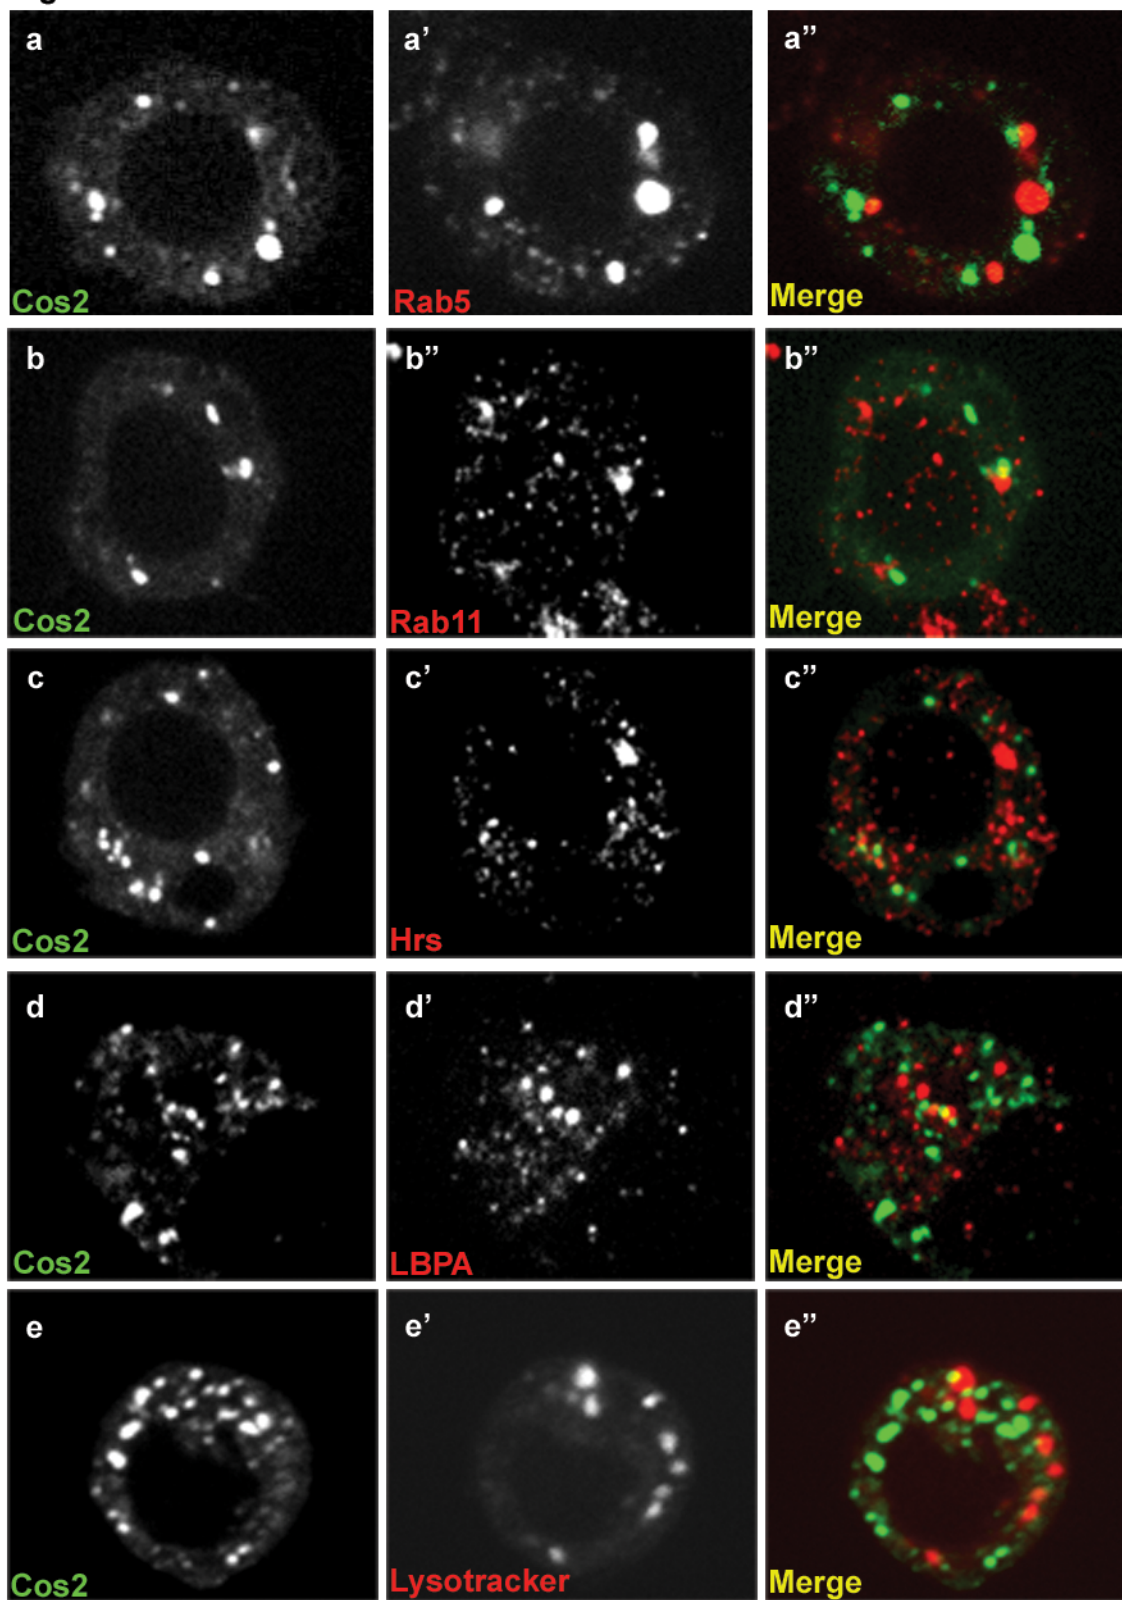

Supplement: NIHMS117140-supplement-s2.pdf [file NIHMS117140-supplement-s2.pdf]

**Figure S3.**

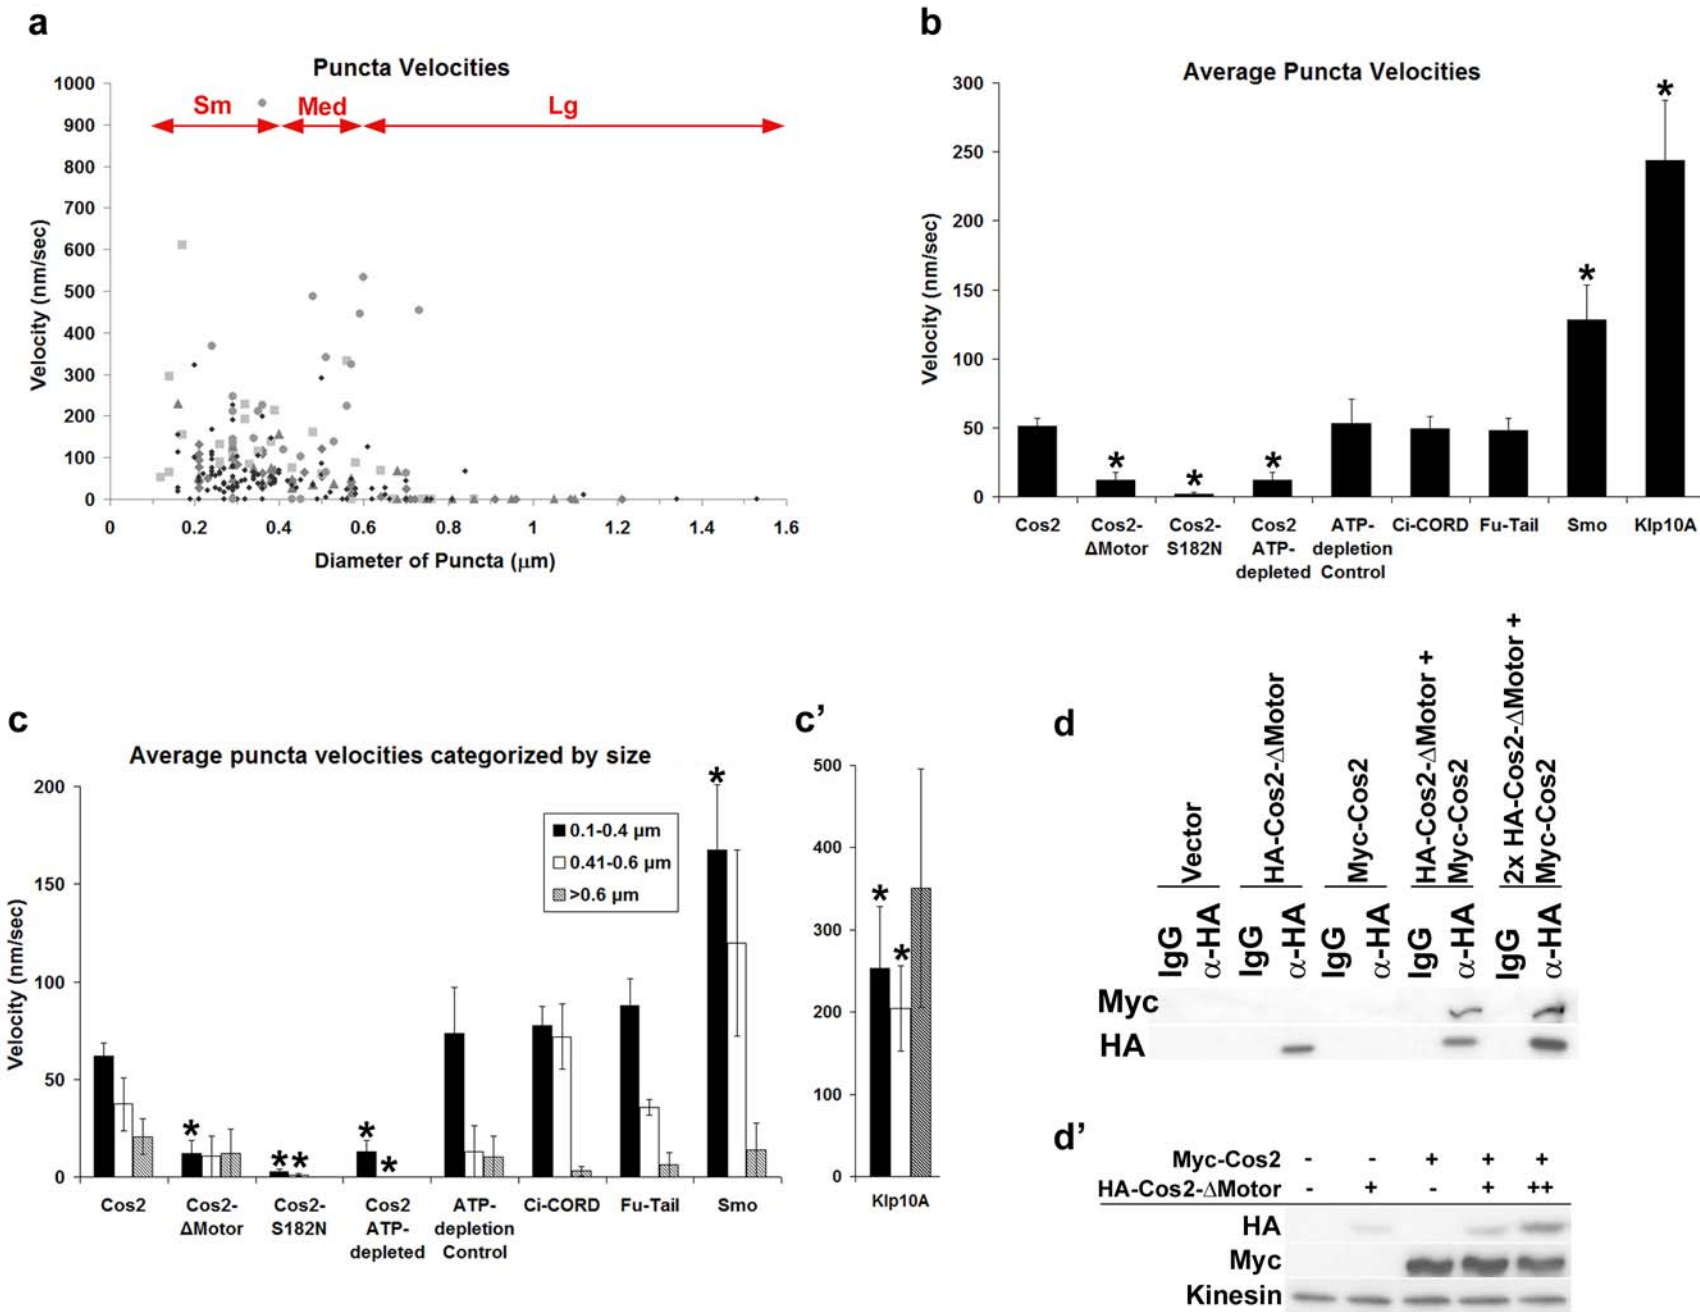

Supplement: NIHMS117140-supplement-s3.pdf [file NIHMS117140-supplement-s3.pdf]

Figure S4.

a

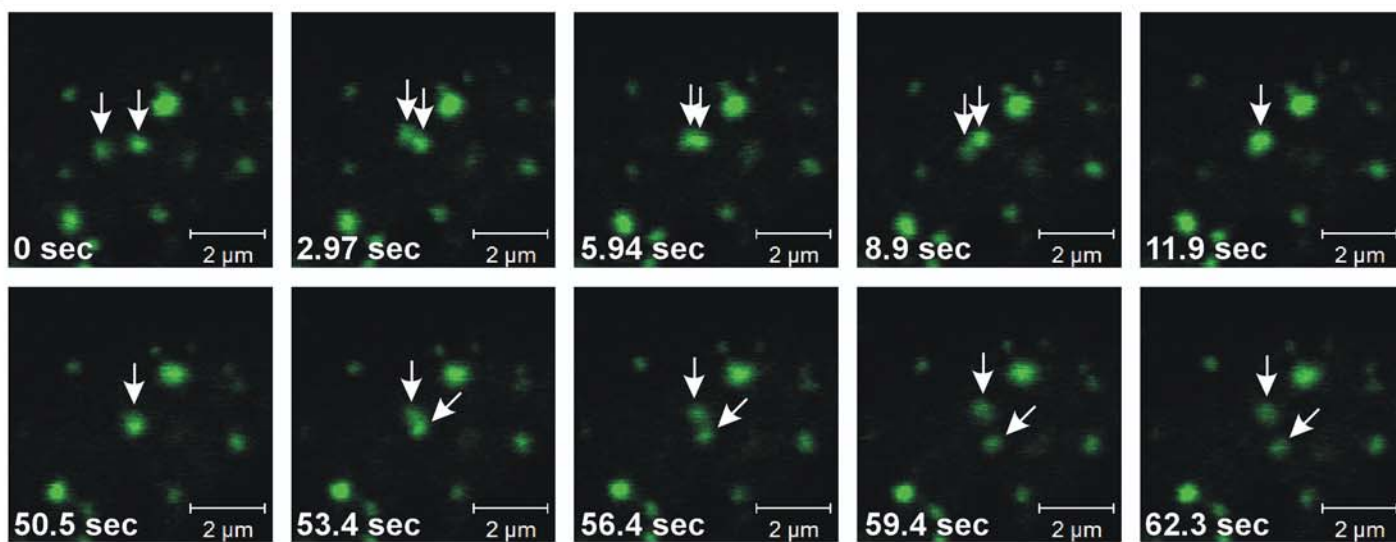

b

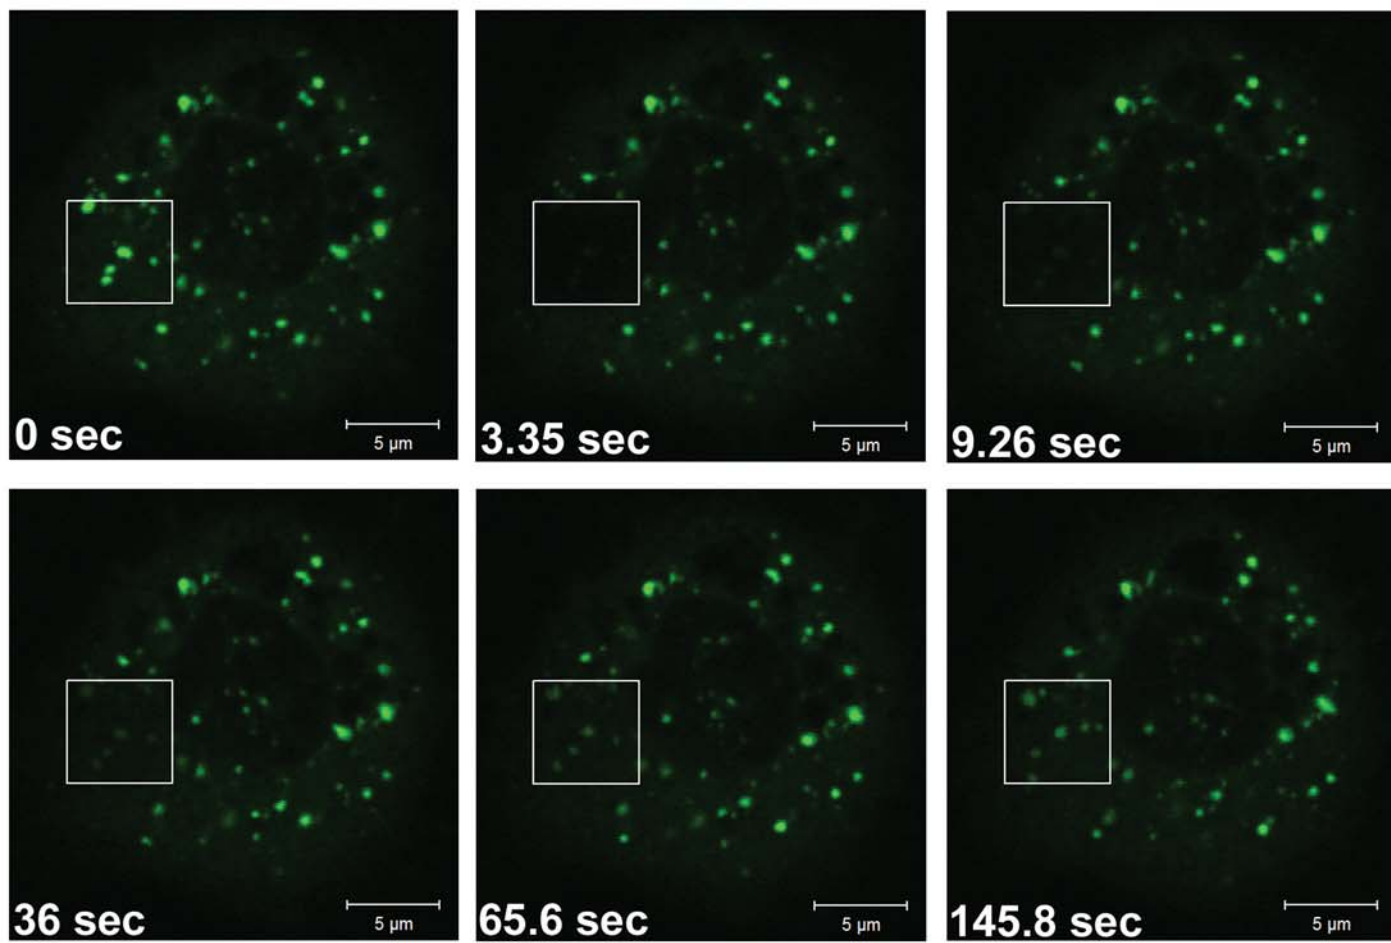

Supplement: NIHMS117140-supplement-s4.pdf [file NIHMS117140-supplement-s4.pdf]

Figure S5.

a

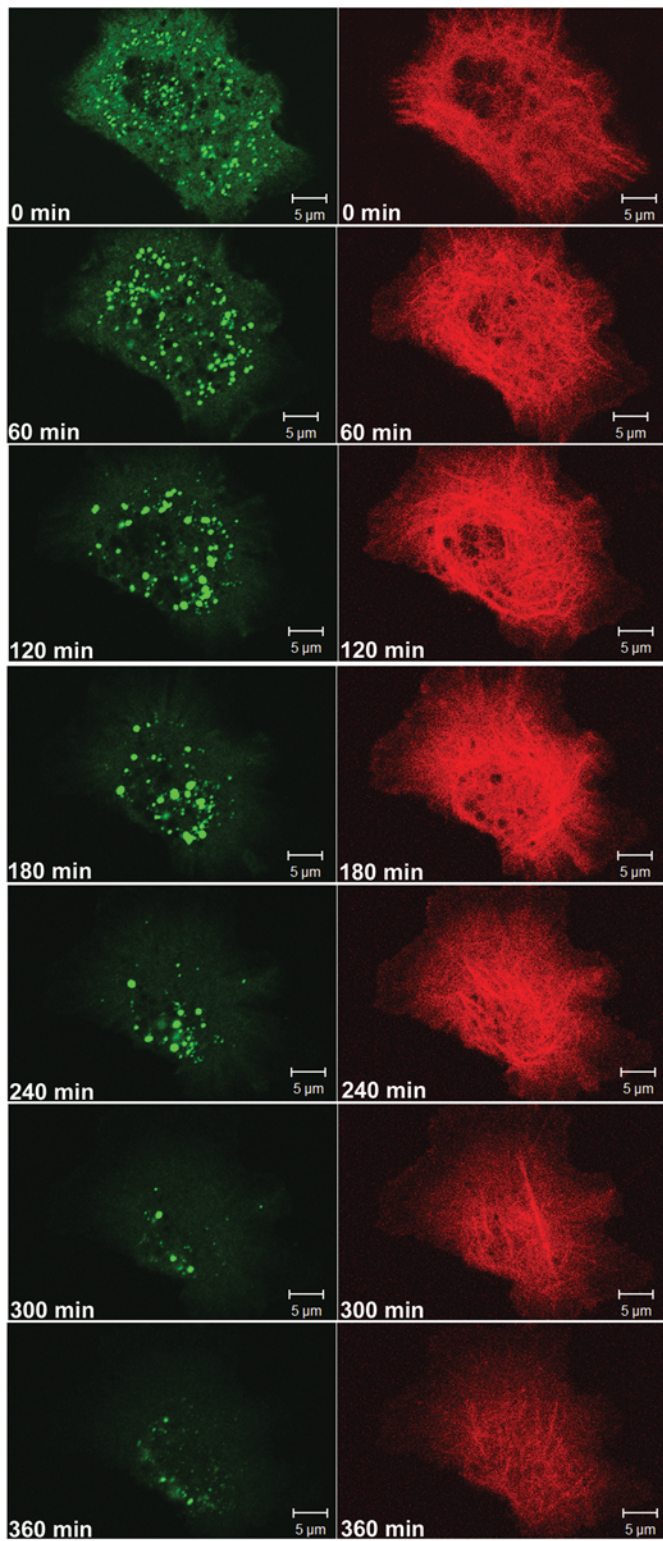

b

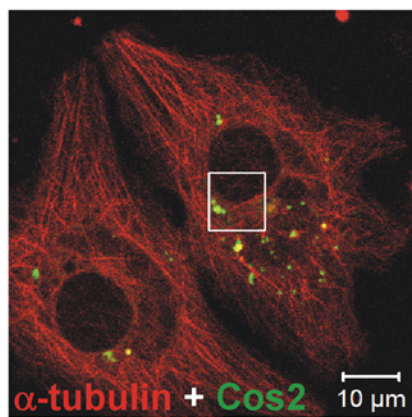

b'

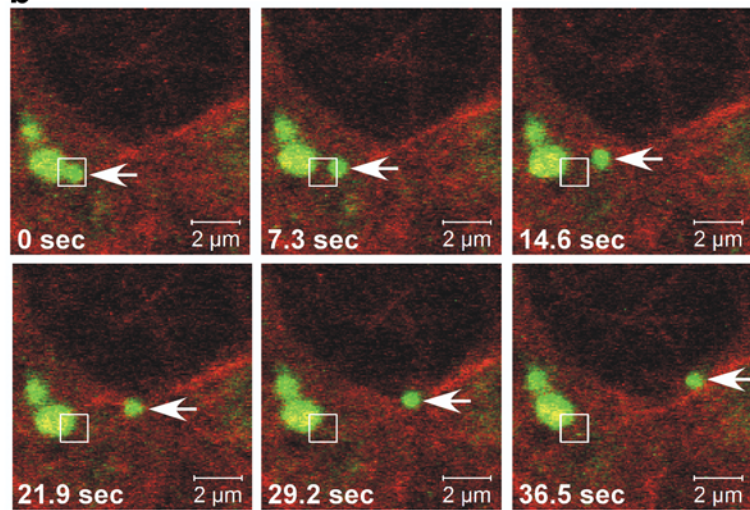

Supplement: NIHMS117140-supplement-s5.pdf [file NIHMS117140-supplement-s5.pdf]

**Figure S6.**

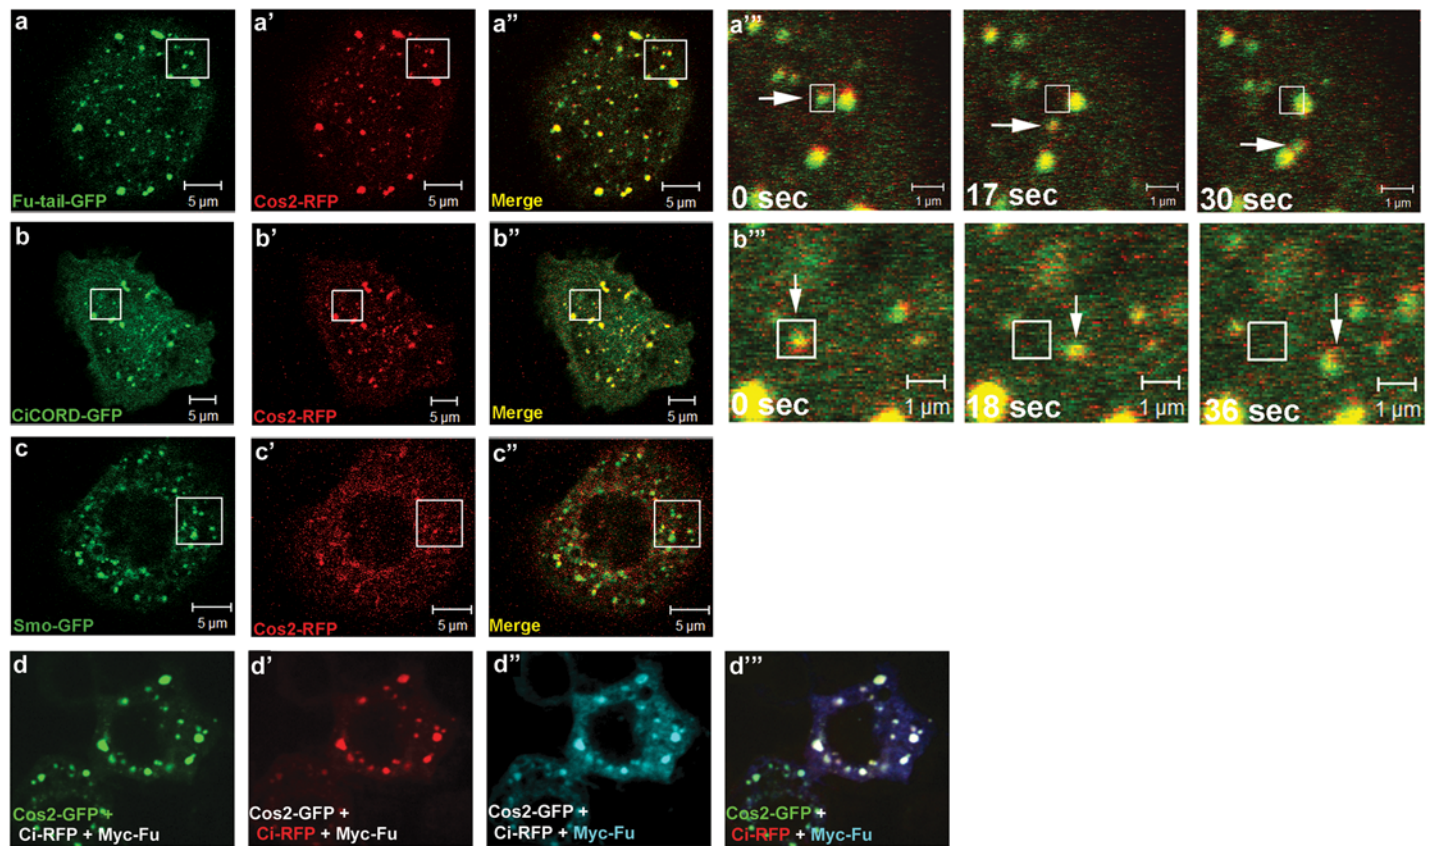

Supplement: NIHMS117140-supplement-s6.pdf [file NIHMS117140-supplement-s6.pdf]
